# Supplementary material
Source: PubMed Central journal article supplement (PMC7906294)
Supplement: NIHMS1601459-supplement-1.pdf [file NIHMS1601459-supplement-1.pdf]

**Supplementary Table 1. Mass cytometry antibody panel**

| <b>Label</b> | <b>Target</b> | <b>Clone</b> | <b>Vendor</b> |
|--------------|---------------|--------------|---------------|
| 89Y          | CD45          | HI30         | Fluidigm      |
| 141Pr        | OX-40         | ACT35        | Biologend     |
| 142Nd        | CD19          | HIB19        | Fluidigm      |
| 143Nd        | HLADR         | L243         | Biologend     |
| 144Nd        | CD69          | FN50         | Fluidigm      |
| 145Nd        | CD4           | RPAT4        | Fluidigm      |
| 146Nd        | CD8           | RPAT8        | Fluidigm      |
| 147Sm        | CD11c         | Bu15         | Fluidigm      |
| 148Nd        | CD14          | RMO52        | Fluidigm      |
| 149Sm        | CD200         | OX104        | Fluidigm      |
| 150Nd        | SOX2          | O30678       | Fluidigm      |
| 151Eu        | CD103         | BerACT8      | Fluidigm      |
| 152Sm        | CD309         | 7D4-6        | Biologend     |
| 153Eu        | TIGIT         | MBSA43       | Fluidigm      |
| 154Sm        | TIM3          | F382E2       | Fluidigm      |
| 155Gd        | CD27          | L128         | Fluidigm      |
| 156Gd        | CXCR5         | J25204       | Biologend     |
| 158Gd        | CD33          | WM53         | Fluidigm      |
| 159Tb        | CCR7          | G043H7       | Fluidigm      |
| 160Gd        | T-Bet         | 4B10         | Fluidigm      |
| 161Dy        | VEGF          | 23410        | Fluidigm      |
| 162Dy        | FOXP3         | PCH101       | Fluidigm      |
| 163Dy        | BTLA          | MIH26        | Fluidigm      |
| 164Dy        | CD95          | DX2          | Fluidigm      |
| 165Ho        | CD45RO        | UCHL1        | Fluidigm      |
| 166Er        | CD36          | 5-271        | Biologend     |
| 167Er        | CD11b         | ICRF44       | Fluidigm      |
| 168Er        | Ki67          | Ki-67        | Fluidigm      |
| 169Tm        | CD25          | 2A3          | Fluidigm      |
| 170Er        | CD3           | UCHT1        | Fluidigm      |
| 171Yb        | Granzyme      | GB11         | Fluidigm      |
| 172Yb        | CD38          | HIT2         | Fluidigm      |
| 173Yb        | 4-1BB         | 4841         | Biologend     |
| 174Yb        | PDL1          | EH12.2H7     | Fluidigm      |
| 175Lu        | PD1           | 29E.2A3      | Fluidigm      |
| 176Yb        | CD56          | HCD56        | BD Pharmingen |
| 209Bi        | CD16          | 3G8          | Biologend     |

**Supplementary Table 2. SOX2 peptide library**

---

|    |                                 |    |                               |
|----|---------------------------------|----|-------------------------------|
| 1  | H-S-A-R-M-Y-N-M-M-E-T-E-L-K     | 44 | V-N-Q-R-M-D-S-Y-A-H-M-N-G-W-S |
| 2  | R-M-Y-N-M-M-E-T-E-L-K-P-P-G     | 45 | M-D-S-Y-A-H-M-N-G-W-S-N-G-S-Y |
| 3  | N-M-M-E-T-E-L-K-P-P-G-P-Q-Q-T   | 46 | A-H-M-N-G-W-S-N-G-S-Y-S-M-M   |
| 4  | T-E-L-K-P-P-G-P-Q-Q-T-S-G-G-G   | 47 | N-G-W-S-N-G-S-Y-S-M-M-Q-D-Q-L |
| 5  | P-P-G-P-Q-Q-T-S-G-G-G-G-N-S     | 48 | N-G-S-Y-S-M-M-Q-D-Q-L-G-Y     |
| 6  | P-Q-Q-T-S-G-G-G-G-N-S-T-A-A     | 49 | S-Y-S-M-M-Q-D-Q-L-G-Y-P-Q-H   |
| 7  | S-G-G-G-G-N-S-T-A-A-A-A-G-G     | 50 | M-M-Q-D-Q-L-G-Y-P-Q-H-P-G-L   |
| 8  | G-G-N-S-T-A-A-A-A-G-G-N-Q-K     | 51 | D-Q-L-G-Y-P-Q-H-P-G-L-N-A-H-G |
| 9  | S-T-A-A-A-A-G-G-N-Q-K-N-S       | 52 | Y-P-Q-H-P-G-L-N-A-H-G-A-A-Q-M |
| 10 | A-A-A-A-G-G-N-Q-K-N-S-P-D-R-V   | 53 | P-G-L-N-A-H-G-A-A-Q-M-Q-P-M-H |
| 11 | G-G-N-Q-K-N-S-P-D-R-V-K-R-P-M   | 54 | A-H-G-A-A-Q-M-Q-P-M-H-R-Y-D-V |
| 12 | K-N-S-P-D-R-V-K-R-P-M-N-A-F-M   | 55 | A-Q-M-Q-P-M-H-R-Y-D-V-S-A-L   |
| 13 | D-R-V-K-R-P-M-N-A-F-M-V-W-S-R   | 56 | M-Q-P-M-H-R-Y-D-V-S-A-L-Q-Y   |
| 14 | R-P-M-N-A-F-M-V-W-S-R-G-Q-R-R   | 57 | M-H-R-Y-D-V-S-A-L-Q-Y-N-S-M-T |
| 15 | A-F-M-V-W-S-R-G-Q-R-R-K-M-A     | 58 | D-V-S-A-L-Q-Y-N-S-M-T-S-S-Q-T |
| 16 | V-W-S-R-G-Q-R-R-K-M-A-Q-E-N-P-K | 59 | L-Q-Y-N-S-M-T-S-S-Q-T-Y-M-N-G |
| 17 | G-Q-R-R-K-M-A-Q-E-N-P-K-M-H     | 60 | S-M-T-S-S-Q-T-Y-M-N-G-S-P-T-Y |
| 18 | R-K-M-A-Q-E-N-P-K-M-H-N-S-E-I   | 61 | S-Q-T-Y-M-N-G-S-P-T-Y-S-M-S-Y |
| 19 | A-Q-E-N-P-K-M-H-N-S-E-I-S-K-R   | 62 | M-N-G-S-P-T-Y-S-M-S-Y-S-Q-Q-G |
| 20 | P-K-M-H-N-S-E-I-S-K-R-L-G-A     | 63 | P-T-Y-S-M-S-Y-S-Q-Q-G-T-P-G-M |
| 21 | H-N-S-E-I-S-K-R-L-G-A-E-W-K-L   | 64 | M-S-Y-S-Q-Q-G-T-P-G-M-A-L-G-S |
| 22 | I-S-K-R-L-G-A-E-W-K-L-L-S-E-T   | 65 | S-Q-Q-G-T-P-G-M-A-L-G-S-M-G-S |
| 23 | L-G-A-E-W-K-L-L-S-E-T-E-K-R     | 66 | T-P-G-M-A-L-G-S-M-G-S-V-V-K-S |
| 24 | E-W-K-L-L-S-E-T-E-K-R-P-F-I     | 67 | A-L-G-S-M-G-S-V-V-K-S-E-A-S-S |
| 25 | L-L-S-E-T-E-K-R-P-F-I-D-E-A-K   | 68 | M-G-S-V-V-K-S-E-A-S-S-S-P-P-V |
| 26 | T-E-K-R-P-F-I-D-E-A-K-R-L-R-A   | 69 | V-K-S-E-A-S-S-S-P-P-V-V-T-S-S |
| 27 | P-F-I-D-E-A-K-R-L-R-A-L-H-M-K   | 70 | A-S-S-S-P-P-V-V-T-S-S-S-H-S-R |
| 28 | E-A-K-R-L-R-A-L-H-M-K-E-H       | 71 | P-P-V-V-T-S-S-S-H-S-R-A       |
| 29 | K-R-L-R-A-L-H-M-K-E-H-P-D-Y-K   | 72 | P-V-V-T-S-S-S-H-S-R-A-P-C-Q-A |
| 30 | A-L-H-M-K-E-H-P-D-Y-K-Y-R-P-R   | 73 | S-S-S-H-S-R-A-P-C-Q-A-G-D-L-R |
| 31 | K-E-H-P-D-Y-K-Y-R-P-R-R-K-T-K   | 74 | S-R-A-P-C-Q-A-G-D-L-R-D-M-I-S |
| 32 | D-Y-K-Y-R-P-R-R-K-T-K-T-L-M-K   | 75 | C-Q-A-G-D-L-R-D-M-I-S-M-Y-L   |
| 33 | R-P-R-R-K-T-K-T-L-M-K-K-D-K-Y   | 76 | G-D-L-R-D-M-I-S-M-Y-L-P-G-A   |
| 34 | K-T-K-T-L-M-K-K-D-K-Y-T-L-P-G   | 77 | R-D-M-I-S-M-Y-L-P-G-A-E-V     |
| 35 | L-M-K-K-D-K-Y-T-L-P-G-G-L-L-A   | 78 | M-I-S-M-Y-L-P-G-A-E-V-P-E-P-A |
| 36 | D-K-Y-T-L-P-G-G-L-L-A-P-G-G     | 79 | Y-L-P-G-A-E-V-P-E-P-A-A-P-S-R |
| 37 | T-L-P-G-G-L-L-A-P-G-G-N-S-M-A   | 80 | A-E-V-P-E-P-A-A-P-S-R-L-H-M-S |
| 38 | G-L-L-A-P-G-G-N-S-M-A-S-G-V-G   | 81 | E-P-A-A-P-S-R-L-H-M-S-Q-H-Y   |
| 39 | P-G-G-N-S-M-A-S-G-V-G-V-G-A-G   | 82 | A-P-S-R-L-H-M-S-Q-H-Y-Q-S-G   |

40 S-M-A-S-G-V-G-V-G-A-G-L-G-A-G

41 G-V-G-V-G-A-G-L-G-A-G-V-N-Q-R

42 G-A-G-L-G-A-G-V-N-Q-R-M-D-S-Y

43 G-A-G-V-N-Q-R-M-D-S-Y-A-H-M

83 R-L-H-M-S-Q-H-Y-Q-S-G-P-V-P-G

84 S-Q-H-Y-Q-S-G-P-V-P-G-T-A-I

85 Y-Q-S-G-P-V-P-G-T-A-I-N-G-T-L

86 P-V-P-G-T-A-I-N-G-T-L-P-L-S-H-M

---

**Pool 1:** 1-22 **Pool 2:** 23-44 **Pool 3:** 45-66 **Pool 4:** 67-86

**Supplementary Table 3.** Characteristics of patients tested for SOX2 T-cell reactivity

| <b>Subtype</b>                   | <b>Age</b> | <b>Gender</b> | <b>WHO Grade</b> | <b>Tumor Location</b> | <b>BRAF V600E</b> | <b>IDH1</b> | <b>1P 19Q</b> | <b>MGMT</b>  |
|----------------------------------|------------|---------------|------------------|-----------------------|-------------------|-------------|---------------|--------------|
| JPA                              | 6          | F             | I                | Brainstem             | Positive          | Negative    | N/A           | N/A          |
| JPA                              | 13         | M             | I                | Cerebral              | Negative          | N/A         | N/A           | N/A          |
| JPA                              | 6          | F             | I                | Posterior Fossa       | Negative          | Negative    | N/A           | N/A          |
| JPA                              | 6          | F             | I                | Cerebral              | Negative          | Negative    | N/A           | N/A          |
| JPA                              | 10         | F             | I                | Posterior Fossa       | Negative          | Negative    | N/A           | N/A          |
| Diffuse Astrocytoma              | 4          | M             | II               | Cerebral              | Negative          | Negative    | Negative      | N/A          |
| Anaplastic Astrocytoma           | 4          | F             | III              | Brainstem             | Negative          | Negative    | N/A           | Unmethylated |
| Anaplastic Astrocytoma           | 36         | M             | III              | Cerebral              | N/A               | N/A         | N/A           | N/A          |
| Ganglioglioma                    | 8          | F             | I                | Cerebral              | Negative          | N/A         | N/A           | N/A          |
| Anaplastic Ganglioglioma         | 18         | F             | III              | Cerebral              | Positive          | Negative    | Positive      | Unmethylated |
| Oligodendroglioma                | 29         | M             | II               | Cerebral              | N/A               | Positive    | Negative      | Methylated   |
| Oligodendroglioma                | 22         | M             | III              | Cerebral              | N/A               | Positive    | Positive      | N/A          |
| Glioblastoma                     | 22         | F             | IV               | Cerebral              | Negative          | Negative    | Negative      | Unmethylated |
| Diffuse Intrinsic Pontine Glioma | 4          | F             | N/A              | Brainstem             | N/A               | N/A         | N/A           | N/A          |

**Supplementary Table 4. Patient Characteristics and SOX2 T-cell Response**

|                                   | <b>SOX2 T-cell Response</b> |             | <b>p value</b> |
|-----------------------------------|-----------------------------|-------------|----------------|
|                                   | <b>+</b>                    | <b>-</b>    |                |
| Histology                         |                             |             |                |
| LGG (WHO I+II)                    | 60%                         | 55%         | ns             |
| Median age (range in years)       | 16.6 (4-29)                 | 11.6 (4-22) | ns             |
| Treatment                         |                             |             |                |
| Surgery Alone                     | 60%                         | 44.4%       | ns             |
| Chemotherapy                      | 20%                         | 55.6%       | ns             |
| None                              | 20%                         | 0%          | ns             |
| Corticosteroids (within 2 months) | 20%                         | 11.1%       | ns             |
